# Supplementary material for: IMPELLA® or Extracorporeal Membrane Oxygenation for Left Ventricular Dominant Refractory Cardiogenic Shock
Source: PubMed Central journal article supplement (PMC7918655; doi:10.3390/jcm10040759), 2021-02-14
Supplement: jcm-10-00759-s001.pdf [file jcm-10-00759-s001.pdf]

## Supplementary Materials

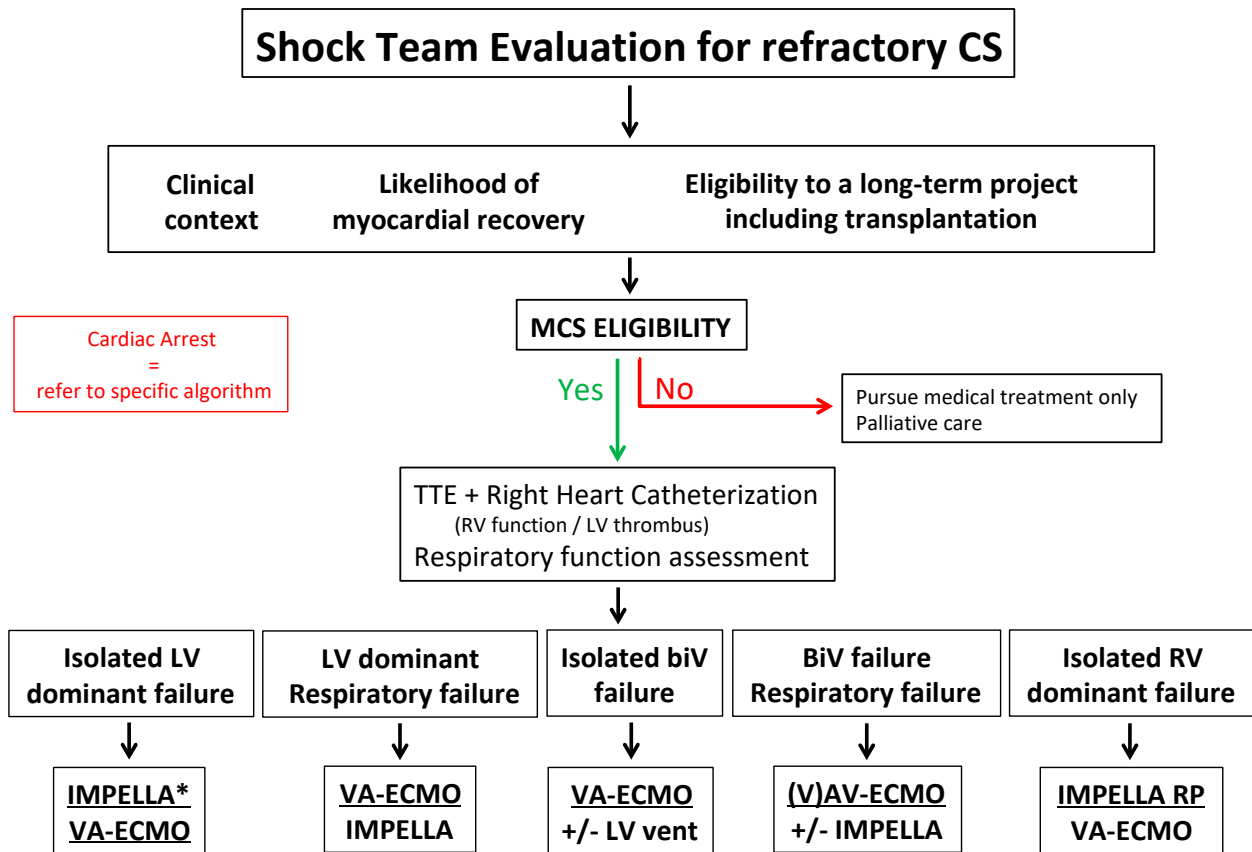

**Figure S1.** Local protocol for refractory CS management.

CS=cardiogenic shock; MCS=mechanical circulatory support; TTE=transthoracic echocardiography; LV=left ventricle; RV=right ventricle; biV=biventricular; VA-ECMO=veno-arterial extracorporeal membrane oxygenation; \*Preferred strategy if AMI / pulmonary edema / moderate organ failure / acceptable RV function / LV thrombus absence

**Table S1.** Variables associated with 6-month mortality after adjustment (univariate analysis).

|                                                  | <b>Total population</b><br><i>n</i> = 128 | <b>Alive at 6 Months</b><br><i>n</i> = 61 | <b>Dead at 6 Months</b><br><i>n</i> = 67 | <i>p</i> |
|--------------------------------------------------|-------------------------------------------|-------------------------------------------|------------------------------------------|----------|
| <b>Demographics and Medical History</b>          |                                           |                                           |                                          |          |
| Age (years)                                      | 53.8 +/- 13.1                             | 50.3 +/- 13.9                             | 57+/- 11.5                               | 0.003    |
| Sex (male), <i>n</i> (%)                         | 93 (72.7%)                                | 38 (62.3%)                                | 55 (82.1%)                               | 0.012    |
| Body mass index (Kg/m <sup>2</sup> )             | 27 +/- 4.9                                | 26.5 +/- 4.7                              | 27.4 +/- 5                               | 0.264    |
| Diabetes, <i>n</i> (%)                           | 25 (19.5%)                                | 8 (13.1%)                                 | 17 (25.4%)                               | 0.067    |
| History of coronary artery disease, <i>n</i> (%) | 34 (26.6%)                                | 14 (23%)                                  | 20 (29.9%)                               | 0.377    |
| History of stroke, <i>n</i> (%)                  | 4 (3.1%)                                  | 0                                         | 4 (6%)                                   | 0.120    |
| Peripheral artery disease, <i>n</i> (%)          | 3 (2.3%)                                  | 0                                         | 3 (4.5%)                                 | 0.244    |
| Renal failure before admission, <i>n</i> (%)     | 7 (5.5%)                                  | 3 (4.9%)                                  | 4 (6%)                                   | 0.999    |
| <b>Admission</b>                                 |                                           |                                           |                                          |          |
| Acute myocardial infarction, <i>n</i> (%)        | 72 (56.3%)                                | 31 (50.8%)                                | 41 (61.2%)                               | 0.237    |
| LVEF (%)                                         | 21.8 +/- 15.5                             | 21.4 +/- 14.1                             | 22.1+/- 17                               | 0.843    |
| Creatinine (mg/L)                                | 18 +/- 10.1                               | 15.3 +/- 7.1                              | 20.6 +/- 11.8                            | 0.003    |
| Hemoglobin (g/dL)                                | 11.9 +/- 2.6                              | 11.6 +/- 2.7                              | 12.1 +/- 2.5                             | 0.296    |
| Lactate (mmol/L)                                 | 5.82 +/- 4.93                             | 4.76 +/- 3.43                             | 6.89 +/- 5.91                            | 0.019    |
| ASAT (IU/L)                                      | 460 +/- 749                               | 455.7 +/- 904.5                           | 464.3 +/- 555.9                          | 0.950    |
| ALAT (IU/L)                                      | 269.5 +/- 552.1                           | 228.6 +/- 509.8                           | 307.7 +/- 590.4                          | 0.432    |
| PT (%)                                           | 63.2 +/- 31.2                             | 67.1 +/- 38.6                             | 59.2 +/- 20.9                            | 0.184    |
| Bilirubin (mg/L)                                 | 13.2 +/- 14.5                             | 12 +/- 12.3                               | 14.4 +/- 16.5                            | 0.405    |
| CRP-us (mg/L)                                    | 68.7 +/- 75.9                             | 60.1 +/- 68.7                             | 78 +/- 82.8                              | 0.236    |
| <b>Mechanical Support</b>                        |                                           |                                           |                                          |          |
| VA-ECMO, <i>n</i> (%)                            | 107 (83.6%)                               | 51 (83.6%)                                | 56 (83.6%)                               | 0.997    |
| IMPELLA®, <i>n</i> (%)                           | 41 (32%)                                  | 14 (23%)                                  | 27 (40.3%)                               | 0.036    |
| IMPELLA-CP®, <i>n</i> (%)                        | 34 (26.6%)                                | 13 (21.3%)                                | 21 (31.3%)                               | 0.224    |
| VA-ECMO as first device, <i>n</i> (%)            | 97 (75.8%)                                | 50 (82%)                                  | 47 (70.1%)                               | 0.119    |
| IMPELLA® as first device, <i>n</i> (%)           | 31 (24.2%)                                | 11 (18%)                                  | 20 (29.9%)                               | 0.119    |
| Duration of MCS (Days)                           | 8.6 +/- 9.2                               | 9.1 +/- 11.1                              | 8.1 +/- 7.2                              | 0.544    |

**Table S2.** Variables associated with 6-month mortality after adjustment (Cox multivariate analysis, model 1).

|                                          | <b>Hazard Ratio</b> | <b>95% Confidence Interval</b> | <b><i>p</i></b> |
|------------------------------------------|---------------------|--------------------------------|-----------------|
| Age (per year)                           | 1.04                | 1.01-1.07                      | 0.028           |
| Sex male                                 | 4.90                | 1.87-12.89                     | 0.001           |
| Diabetes                                 | 1.54                | 0.74-3.22                      | 0.249           |
| Acute myocardial infarction at admission | 2.19                | 1.11-4.32                      | 0.025           |
| LVEF (per %)                             | 0.99                | 0.97-1.01                      | 0.233           |
| Lactate level (per one unit)             | 1.17                | 1.10-1.24                      | <0.001          |
| Creatinine level (per one unit)          | 1.05                | 1.01-1.08                      | 0.005           |
| Hemoglobin level (per one unit)          | 0.94                | 0.83-1.06                      | 0.324           |
| VA-ECMO first                            | 0.27                | 0.11-0.64                      | 0.001           |

Cox model: age, sex, diabetes, acute myocardial infarction at admission, left ventricle ejection fraction, lactate level, creatinine level, hemoglobin level, VA-ECMO first. Variables of interest were selected based on the previous literature. LVEF = left ventricular ejection fraction; VA-ECMO = veno-arterial membrane oxygenation.

**Table S3.** Variables associated with 30-day mortality after adjustment (Cox multivariate analysis, model 2).

|                                          | <b>Hazard Ratio</b> | <b>95% Confidence Interval</b> | <b><i>p</i></b> |
|------------------------------------------|---------------------|--------------------------------|-----------------|
| Age (per year)                           | 1.04                | 0.99-1.07                      | 0.059           |
| Sex male                                 | 4.73                | 1.63-13.73                     | 0.004           |
| Acute myocardial infarction at admission | 3.22                | 1.44-7.16                      | 0.004           |
| Lactate level (per one unit)             | 1.16                | 1.09-1.23                      | <0.001          |
| Creatinine level (per one unit)          | 1.05                | 1.01-1.10                      | 0.012           |
| VA-ECMO first                            | 0.38                | 0.18-0.74                      | 0.007           |

Cox model: variables associated with 30-day mortality in univariate analysis (Cf. Table 3). VA-ECMO = veno-arterial membrane oxygenation.

**Table S4.** Variables associated with 6-month mortality after adjustment (Cox multivariate analysis, model 2).

|                                 | <b>Hazard Ratio</b> | <b>95% Confidence Interval</b> | <b><i>p</i></b> |
|---------------------------------|---------------------|--------------------------------|-----------------|
| Age (per year)                  | 1.04                | 1.01-1.07                      | 0.011           |
| Sex male                        | 3.43                | 1.59-7.41                      | 0.002           |
| Lactate level (per one unit)    | 1.16                | 1.10-1.22                      | <0.001          |
| Creatinine level (per one unit) | 1.04                | 1.01-1.07                      | 0.003           |
| VA-ECMO first                   | 0.34                | 0.17-0.67                      | 0.002           |

Cox model: variables associated with 6-month mortality in univariate analysis (Cf. Supplemental Table S1). VA-ECMO = veno-arterial membrane oxygenation.
